# Supplementary material for: Incorporation of Al 3+ into turbostratic graphite: an efficient route toward improved thermal and electrical conductivity
Source: Royal Society of Chemistry journal article supplement (doi:10.1039/d5tc03109e), 2025-10-27
Supplement: d5tc03109e1.pdf [file d5tc03109e1.pdf]

## Supplementary Information

### Incorporation of $\text{Al}^{3+}$ into turbostratic graphite: An efficient route toward improved thermal and electrical conductivity

Hsin-Jung Tsai<sup>1</sup>, Kai-Le, Lin<sup>1</sup>, Ping-Chun Chen<sup>1</sup>, Han-Chen Chang<sup>2</sup>, Wen-Kuang Hsu<sup>1\*</sup>

1. Department of Materials Science and Engineering, National Tsing-Hua University, Hsinchu City, 300044, Taiwan
2. Green Energy and Environment Research Laboratories, No. 360, Gaofa 2<sup>nd</sup> Rd, Guiren Dist, Tainan City 711, Taiwan (Shalun Green Energy Science City)

\*Corresponding author: wkhsu@mx.nthu.edu.tw

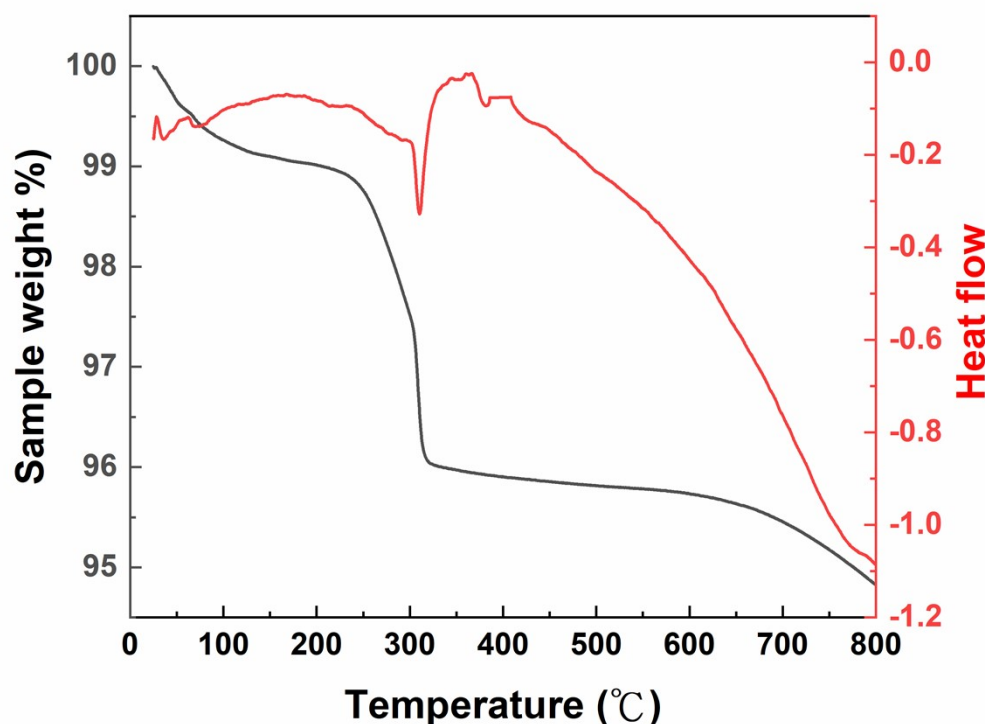

**Figure S1.** TGA/DSC profile recorded from TGS<sub>DES</sub> sample shows an endothermic peak at 300-320°C, corresponding to decomposition of ChCl and carbide formation.
